- 1 **Title page**
- 2 **Classification:** Biological sciences, Genetics
- 3 **Title:** Characterization of SID-1-dependent and independent intergenerational RNA
- 4 transport pathways in *Caenorhabditis elegans*
- 5 **Authors:** Eddie Wang<sup>1</sup>, Craig P. Hunter<sup>1</sup>
- 6 **Author affiliation:** <sup>1</sup>Department of Molecular and Cellular Biology, Harvard University,
- 7 Cambridge, MA 02138
- 8 **Corresponding author:** Craig P. Hunter, 16 Divinity Avenue Room 3044, Cambridge,
- 9 MA 02138. (617)495-8305. [hunter@mcb.harvard.edu](mailto:hunter@mcb.harvard.edu)
- 10 **Keywords:** *Caenorhabditis elegans*, RNAi, double-stranded RNA, yolk

## 11 Abstract

12 Systemic RNA interference (RNAi) in *C. elegans* is dependent on *sid-1* (WINSTON *et al.*  
13 2002), *sid-3* (JOSE *et al.* 2012) and *sid-5* (HINAS *et al.* 2012). After injection, expression,  
14 or ingestion, double-stranded RNA (dsRNA) is transported between cells throughout the  
15 animal to enable RNAi in most tissues, including the germline and progeny. Here, we  
16 characterize the role of the Sid genes in transport of dsRNA to progeny. We previously  
17 reported that dsRNA injected directly in the germline unexpectedly requires *sid-1* activity  
18 in the progeny to initiate RNAi (WINSTON *et al.* 2002). We now show that germline  
19 injected dsRNA can travel by three independent pathways to silence gene expression in  
20 embryos. First, germline injected dsRNA is delivered, presumably by bulk flow, into  
21 oocytes and embryos. This means of delivery, which does not require *sid-1*, is limited by  
22 the amount and location of injected dsRNA. Second, maternal *sid-1* transports  
23 extracellular dsRNA into the germline where it can silence maternal deposited mRNAs  
24 and segregate to embryos to silence embryonically expressed mRNAs. Third,  
25 extracellular dsRNA is also endocytosed into oocytes by the low-density lipoprotein  
26 (LDL) receptor superfamily homolog RME-2. The endocytosed dsRNA then requires  
27 *sid-1* and *sid-5* in embryos to silence embryonically expressed genes. Extracellular  
28 fluorescent dsRNA, once endocytosed into oocytes, does not co-localize with VIT-  
29 2::GFP and it does not require *sid-1* activity to segregate from the late endocytosis  
30 marker GFP::RAB-7 in early embryos. In conclusion, we identify genes and pathways  
31 that function redundantly for intergenerational RNA transfer that may represent  
32 mechanisms for transgenerational epigenetic inheritance.

## 35 Introduction

36 RNA interference is a powerful and well-conserved mechanism for sequence specific  
37 gene silencing (HUTVÄGNER AND ZAMORE 2002). Introduced double stranded RNA  
38 (dsRNA) triggers degradation of homologous transcripts (FIRE *et al.* 1998; HAMILTON AND  
39 BAULCOMBE 1999; ZAMORE *et al.* 2000; SHARP 2001) as well as subsequent  
40 transcriptional gene silencing (GUANG *et al.* 2008; GUANG *et al.* 2010; BUCKLEY *et al.*  
41 2012). In some animals including the nematode *C. elegans*, RNAi is systemic; dsRNA  
42 introduced into the animal by any of several methods results in rapid spread of silencing  
43 throughout the animal (FIRE *et al.* 1998; IVASHUTA *et al.* 2015). This systemic silencing  
44 requires the dsRNA channel SID-1, which imports dsRNA into the cytoplasm (WINSTON  
45 *et al.* 2002; FEINBERG AND HUNTER 2003; SHIH AND HUNTER 2011). SID-1 supports  
46 particularly effective silencing in the progeny of dsRNA exposed mothers (FIRE *et al.*  
47 1998; GRISHOK *et al.* 2000; ALCAZAR *et al.* 2008), implying transfer of dsRNA from  
48 mother to embryo.

49 SID-1 dependent heritable RNAi can be initiated by ingesting dsRNA expressing  
50 bacteria, by tissue-specific expression of dsRNA from transgenes, and by dsRNA  
51 injection into somatic tissues, the germline, or the pseudocoelom (PC, body cavity)  
52 (JOSE *et al.* 2009). Initial investigation of *sid-1*-dependent heritable RNAi by dsRNA  
53 injection showed that dsRNA targeting a germline expressed mRNA injected into the  
54 gonad of *sid-1* mutant animals produced affected progeny, while injection into the  
55 intestine or the PC produced no affected progeny (WINSTON 2002; WINSTON *et al.* 2002).

56 Similar injections into wild-type animals produced near 100% affected progeny. These  
57 results showed that *sid-1* is required for transport of dsRNA into the germline, but is not  
58 required for RNAi itself in the germline. Similar results were expected for injection of  
59 dsRNA targeting the somatic muscle gene *unc-22*, which is required for normal muscle  
60 function. However, while *unc-22* dsRNA injection into wild-type animals produced many  
61 affected progeny, similar injections into *sid-1* mutants failed to produce affected progeny,  
62 even among the progeny of germline injected mothers. This was unexpected because  
63 the syncytial germline cytoplasm is continuous with the oocyte/embryo cytoplasm and  
64 thus SID-1 should not be required. Also unexpectedly, crossing wild-type males to *unc-*  
65 *22* dsRNA injected *sid-1* mutant hermaphrodites restored silencing to the progeny. This  
66 was true for both germline injected mothers (WINSTON *et al.* 2002) as well as PC  
67 injected mothers (WINSTON 2002). These results revealed a role for *sid-1* in the embryo  
68 and an unidentified *sid-1*-independent pathway for dsRNA transport to embryos.

69 Here we report a detailed genetic and cytological investigation of dsRNA  
70 transport into oocytes and embryos. We identify three dsRNA transport process that  
71 support inherited RNAi. First, as expected, germline injected dsRNA segregates,  
72 independent of *sid-1* activity, to embryos resulting in temporally limited silencing.  
73 Second, maternally expressed *sid-1* transports extracellular dsRNA into the germline.  
74 Third, the LDL receptor superfamily homolog RME-2 enables endocytosis of dsRNA into  
75 oocytes, but to initiate RNAi in the resulting embryos zygotic *sid-1* and *sid-5* are  
76 required, presumably to release membrane encapsulated dsRNA into the cytosol. Marré  
77 *et al.* recently confirmed the published observations (WINSTON 2002; WINSTON *et al.*  
78 2002) on an embryonic role for *sid-1* and the presence of a *sid-1*-independent transport  
79 process and also identified RME-2 as important for this *sid-1* independent dsRNA  
80 transport (MARRÉ *et al.* 2016). In contrast to Marré *et al.*, our analysis shows that  
81 maternal RME-2 and SID-1 act independently, as neither single mutant prevents dsRNA  
82 transport to embryos. Our analysis of this discrepancy revealed a strong effect of  
83 maternal developmental stage on inherited RNAi, which only strengthens the  
84 discrepancy. Our analysis of injected labeled dsRNA shows that although dsRNA and  
85 the yolk marker VIT-2::GFP co-localize in the PC space and even on the surface of the  
86 oocyte, internalized VIT-2::GFP and dsRNA do not co-localize. Furthermore, labeling  
87 dsRNA with Cy5 interferes with dsRNA transport into oocytes. This indicates that non-  
88 specific interactions between yolk and dsRNA are unlikely to account for the RME-2  
89 mediated uptake. Our genetic analysis of post-endocytosis dsRNA trafficking shows that  
90 dsRNA either exits the endocytosis pathway early or rapidly transits the pathway  
91 independently of *sid-1*, as dsRNA and late endosome markers do not significantly co-  
92 localize in either wild-type or *sid-1* mutant embryos.

93

## 94 **Results**

### 95 **Inherited silencing in the absence of *sid-1***

96 SID-1 is required to transport dsRNA or derived silencing signals to the germline, as  
97 shown by injecting dsRNA into specific tissues or the PC (WINSTON 2002; WINSTON *et al.*  
98 2002). However, while *unc-22* dsRNA injection into any tissue in wild-type animals  
99 resulted in silenced progeny, *unc-22* dsRNA injected into the syncytial germline of a *sid-*  
100 *1* mutant, unexpectedly, did not result in any affected progeny (WINSTON 2002; WINSTON  
101 *et al.* 2002). To further investigate this result, we injected *unc-22* dsRNA directly into the  
102 syncytial gonads of wild-type and *sid-1* mutant adult hermaphrodites and every two  
103 hours after injection collected their self-progeny. As expected, and consistent with  
104 previous observations of systemic silencing, the proportion of twitching progeny from  
105 injected wild-type animals quickly rose to 100% and was sustained for the duration of  
106 the experiment (Fig. 1B). In contrast to previous observations, we found that injecting  
107 dsRNA directly into the syncytial gonads of *sid-1*<sup>-/-</sup> animals produced strongly twitching  
108 progeny. However, this was only true of embryos laid within approximately the first 18  
109 hours after injection (Fig. 1A). The timing of peak silencing varied between injected P<sub>0</sub>  
110 animals, but always reached 100% (Fig. S1). The subsequent decrease in fraction of  
111 silenced F<sub>1</sub> embryos to zero suggests that the injected *unc-22* dsRNA is rapidly  
112 depleted. In the previous experiments (WINSTON 2002; WINSTON *et al.* 2002), the  
113 injected hermaphrodites were allowed to recover for up to 24 hours before progeny  
114 were collected and scored for silencing. The apparent rapid depletion of syncytial  
115 germline injected dsRNA explains the past failure to detect *sid-1*-independent silencing.  
116 Furthermore, when a single gonad arm was injected in *sid-1* mutant animals, only a  
117 maximum of 50% twitching progeny was produced (Fig. 1C, S1). Thus, *sid-1*  
118 independent silencing is restricted to the cytoplasm containing the injected dsRNA. In  
119 contrast, the control injections into a single gonad of wild-type hermaphrodites clearly  
120 show gonad injected dsRNA is mobile between gonad arms (Fig. 1D). Additionally, in  
121 wild type animals, dsRNA or a derived silencing signal persists indefinitely in the  
122 injected hermaphrodites. Interestingly, injecting *unc-22* dsRNA into a single gonad arm  
123 of *sid-1* mutant hermaphrodites and then crossing them to wild-type males produced  
124 nearly 100% affected heterozygous cross progeny (Fig 1E). This indicates that *sid-1*  
125 activity in the mother is not required for either gonad to gonad transfer of dsRNA or the  
126 long-term persistence of the silencing signal, and that *sid-1* activity in the embryo is  
127 required to access this dsRNA or derived silencing signal.

128

### 129 ***sid-1*-independent dsRNA Transmission Requires RME-2**

130 The above results, showing *sid-1*-independent delivery of dsRNA from mothers to  
131 embryos and a *sid-1*-dependent step in the embryos for effective RNAi is similar to  
132 feeding RNAi, where the uptake and transport of ingested dsRNA is separable. Feeding  
133 RNAi first requires SID-2, an intestinal-lumen-localized transmembrane protein, for  
134 endocytosis of ingested dsRNA, and SID-1 is required subsequently for effective RNAi  
135 within intestinal cells, likely to release dsRNA from endosomes (WINSTON *et al.* 2007;  
136 McEWAN *et al.* 2012). A candidate receptor for similar dsRNA endocytosis in the  
137 germline is RME-2, an LDL receptor superfamily homolog that functions in oocytes as a  
138 yolk/lipoprotein receptor. In *C. elegans*, yolk is synthesized in the intestine, exported to  
139 the PC, and then taken up by oocytes via receptor-mediated endocytosis (SHARROCK *et*

140 *al.* 1990; GRANT AND HIRSH 1999). Thus, we hypothesized that PC dsRNA may bind to  
141 either yolk protein, another RME-2 substrate, or directly to RME-2 for endocytosis into  
142 oocytes. To test this hypothesis, we examined *rme-2<sup>-/-</sup>* mutants, which do not take up  
143 any yolk (GRANT AND HIRSH 1999) We injected *unc-22* dsRNA into the PC of *rme-2<sup>-/-</sup>*;  
144 *sid-1<sup>-/-</sup>* double mutant hermaphrodites and then crossed these animals to wild-type  
145 males. The heterozygous cross progeny did not twitch, showing that RME-2 is required  
146 for heritable RNAi (Fig. 3A). This indicates that RME-2 can endocytose PC dsRNA into  
147 oocytes. Similar findings were recently reported by Marré *et al.* (MARRÉ *et al.* 2016).

148  
149 **SID-1 is sufficient in the germline to transmit maternal dsRNA to progeny**  
150 SID-1 and SID-2 are both individually required for feeding RNAi (WINSTON *et al.* 2007).  
151 That is, SID-1 is not sufficient to transport ingested dsRNA into intestinal cells. To  
152 determine whether RME-2 and SID-1 must similarly function together to deliver PC  
153 dsRNA to the silencing components in embryos we injected *unc-22* dsRNA into the PC  
154 of *rme-2<sup>-/-</sup>* single mutants. We found that their progeny showed *Unc-22* defects (Fig. 3A).  
155 This result indicates that, unlike the case in the intestine, SID-1 may directly transport  
156 PC dsRNA to oocytes and embryos.

157 This finding contrast with recent results reporting that *rme-2* single mutants were  
158 defective for inherited RNAi initiated by consuming *unc-22* dsRNA (MARRÉ *et al.* 2016).  
159 The difference in potency between feeding RNAi used by Marré *et al.*, and PC injection  
160 of concentrated *in vitro* transcribed dsRNA as described above may explain their  
161 negative result. To address this, we attempted to repeat their feeding RNAi assay as  
162 described, *i.e.* exposing L4 hermaphrodites to *unc-22* dsRNA-expressing bacteria for  
163 one day before washing and transferring to control bacteria. By these methods, we  
164 failed to detect robust inherited RNAi among the progeny of wild-type parents. Further  
165 analysis revealed a striking dependency on maternal developmental stage for inherited  
166 silencing. We split a batch of freshly hatched wild-type larvae into 3 populations and  
167 exposed each to *unc-22* RNAi food on either day 1 (L1/L2), day 2 (L3/L4), or day 3  
168 (adult) after hatching, thoroughly washing off residual bacteria each day. After a final  
169 wash, animals were allowed to lay F<sub>1</sub> progeny on non-RNAi food. We found that only  
170 animals exposed to *unc-22* food as adults efficiently produced twitching progeny (Fig.  
171 3B), even though the P<sub>0</sub> animals fed on days 1 and 2 still exhibited a strong *Unc-22*  
172 twitching phenotype immediately after RNAi exposure. Using these conditions, we found  
173 that the progeny of wild type and *rme-2* adults placed on *unc-22* food show similar  
174 proportions of twitching progeny (Fig. 3C). Similarly, *rme-2* L4 animals exposed to RNAi  
175 do not produce twitching progeny, in agreement with Marré *et al.* Because inherited  
176 RNAi by dsRNA feeding requires adult exposure, it is reasonable to assume that the  
177 slightly slower development of *rme-2* mutants differentially limited the period of adult  
178 exposure compared to wild-type animals when initially placed on the RNAi food as L4  
179 larvae. In conclusion, independent of the means of dsRNA delivery, *rme-2* is not  
180 required for transport of dsRNA into the germline.

181  
182 ***sid-5* functions with *sid-1* in the embryo**

183 Pseudocoelomic *unc-22* dsRNA transported into oocytes or embryos in the absence of  
184 maternal *sid-1* requires embryonic *sid-1* to silence *unc-22*. We next asked whether *sid-2*,  
185 *sid-3*, or *sid-5* are also required in the embryo. We first crossed *sid-1*; *sid-2* double

186 mutant hermaphrodites injected with *unc-22* dsRNA to either wild type or *sid-2* males  
187 and scored silencing in the cross progeny. If *sid-2* activity is required in the embryo,  
188 then the cross progeny of only the wild type males will twitch. If *sid-2* activity is not  
189 required in the embryo, then the cross progeny of both wild type and *sid-2* males will  
190 twitch. Using this method we determined that neither *sid-2* nor *sid-3* are required for  
191 either maternal uptake or embryonic release (Fig. 2A,B), but we found a striking  
192 requirement for *sid-5* for embryonic release.

193 SID-5 is an endosome-associated protein required for efficient systemic RNAi  
194 (HINAS *et al.* 2012). In our double mutant rescue experiments, no silencing was  
195 observed in the next generation if *sid-5* is not rescued (Fig. 2C), the same effect as if  
196 *sid-1* is not rescued. Because *sid-5* is located on the X-chromosome, crossing a *sid-1<sup>-/-</sup>*;  
197 *sid-5<sup>-/-</sup>* hermaphrodite to a wild-type male results in heterozygous *sid-5<sup>+/-</sup>* hermaphrodite  
198 progeny and hemizygous *sid-5<sup>0/-</sup>* mutant male progeny. When performing the *unc-22*  
199 dsRNA PC injection and rescue in this context, we saw that 100% of hermaphrodite  
200 progeny but none of the male progeny showed the *unc-22* silencing phenotype (Fig. 2C).  
201 The importance of SID-5 in the context of *sid-1*-independent transmission of RNA is  
202 especially surprising given the previous reports of only weak systemic RNAi defects for  
203 *sid-5* mutants (HINAS *et al.* 2012). However, those experiments were performed in the  
204 context of fully functional and normally expressed SID-1, in which case there may be  
205 alternative routes for RNA to reach the cytoplasm that are less dependent on SID-5.  
206

### 207 **Labeled Nucleotides Can Be Used to Visualize Functional Transported dsRNA**

208 Our finding that RME-2 is required for silencing signals to reach developing oocytes and  
209 embryos suggests an association between RNA and yolk. We sought evidence of this  
210 association by labeling and visualizing both components. We synthesized *unc-22*  
211 dsRNA using 5-ethynyluridine (5EU) nucleotides, replacing a significant fraction of the  
212 normal uridine nucleotides with nucleotides carrying the modified base. 5EU carries a  
213 small alkyne modification that allows the RNA to be easily visualized after fixation and  
214 labeling through click chemistry (JAO AND SALIC 2008). 5EU-labeled *unc-22* dsRNA  
215 injected into a single gonad arm of a wild-type worm results in >50% twitching progeny,  
216 indicating that, like unmodified dsRNAs, 5EU dsRNA is both mobile and capable of  
217 silencing target genes (Fig 4A).

218 To determine whether fluorescently labeled 5EU signal represents intact dsRNA  
219 and not degraded nucleotides or other irrelevant species, we used a second label and  
220 synthesized dsRNA composed of one strand labeled with 5EU and the other strand  
221 internally labeled with Cy5-uridine. Although Cy5-labeled dsRNA is not capable of  
222 systemic RNAi, it suffices for demonstrating the properties of labeled dsRNA. We  
223 injected the Cy5:5EU duplex dsRNA into the PC of adult hermaphrodites and several  
224 hours later fixed the animals to visualize both labels (Fig. 4B). Much of the signal  
225 appears in the pseudocoelom as pools surrounding other tissues. Importantly, both  
226 labels are detected in the same locations and their intensities appear closely correlated.  
227 Coinciding labeled RNA was also detected in punctate foci in coelomocytes, providing  
228 further evidence for the structure and stability of the injected RNA.

229 In addition to the Cy5:5EU duplex, we also injected a 1:1 mixture of Cy5-labeled  
230 dsRNA with 5EU-labeled dsRNA. We found that although these mixed dsRNAs were  
231 both readily detectable in the PC, their apparent relative abundances were much less

232 well-correlated than the co-labeled duplex dsRNA, and more frequently one label could  
233 be seen without the other (Fig. 4C). That is, when not physically bound together, each  
234 label appears free to vary independently. Together, these data suggest that 5EU  
235 fluorescence represents *bona fide* dsRNA as opposed to disassociated strands or  
236 degraded nucleotides or labels.

237 We also attempted to detect labeled RNA in embryos from PC-injected  
238 hermaphrodites. The Cy5:5EU heteroduplex was not detected above background in  
239 embryos (Fig. 4D). Furthermore, while we could detect 5EU-labeled RNA punctae in  
240 embryos, the co-injected Cy5-labeled RNA was only detected in the PC and  
241 coelomocytes (Fig. 4E). These observations are consistent with Cy5-containing RNA  
242 being impaired for normal trafficking while 5EU-labeled RNA behaves as expected for  
243 unmodified RNA. The inability of either the Cy5:5EU heteroduplex or Cy5-RNA to enter  
244 embryos suggests there is selectivity in the RME-2-dependent transmission process.  
245 Such selectivity is not expected if dsRNA is simply hitchhiking on yolk proteins.

### 246 247 **Labeled dsRNA and VIT-2::GFP largely fail to co-localize**

248 We next sought to characterize the relationship between dsRNA and yolk. Previous  
249 studies have shown co-localization of yolk and end-labeled dsRNA that lessens after  
250 fertilization (MARRÉ *et al.* 2016). We injected our 5EU-labeled dsRNA into the PC of  
251 adults expressing GFP-labeled yolk (*vit-2::GFP*) and imaged the injected adults as well  
252 as isolated embryos. We detected 5EU-labeled dsRNA co-localized with VIT-2::GFP  
253 granules at the surface of developing oocytes in adult gonads (Fig. 5A), in agreement  
254 with prior observations (MARRÉ *et al.* 2016). This co-localization is consistent with co-  
255 dependence on oocyte-expressed RME-2 for the uptake of yolk and RNA. However,  
256 interior sections contain 5EU punctae not associated with any yolk, suggesting that  
257 although they may share the same endocytosis receptor, they are either separately  
258 endocytosed or sorted to different endosomes soon after import. While previous studies  
259 reported loss of co-localization in embryos past the 4-cell stage (MARRÉ *et al.* 2016),  
260 higher resolution imaging suggests that the separation of yolk and dsRNA can be seen  
261 even earlier in oocytes soon after import (Fig. 5A). Analysis of 5EU-labeled dsRNA and  
262 VIT-2::GFP in embryos is consistent with this view. The majority of detectable 5EU  
263 fluorescence in embryos does not co-localize with GFP fluorescence (Fig. 5B). The lack  
264 of co-localization might reflect *sid-1*-dependent release of dsRNA from endosomes.  
265 However, in *sid-1<sup>-/-</sup>* mutant embryos labeled dsRNA also fails to co-localize with VIT-  
266 2::GFP (Fig. 5B). This further supports the idea that although dsRNA and yolk share a  
267 common mechanism for endocytosis into oocytes, they likely do not share common  
268 endosomal compartments.

### 269 270 **dsRNA Transits RAB-7-Containing Vesicles Independent of SID-1**

271 Since internalized dsRNA appears to be physically separate from yolk granules, we  
272 wondered whether the 5EU punctae might co-localize with the late endosome marker  
273 RAB-7 (FENG *et al.* 1995; GRANT AND HIRSH 1999). We injected adult hermaphrodites in  
274 the PC with 5EU-labeled dsRNA and visualized the resulting embryos in conjunction  
275 with antibody staining against GFP-labeled RAB-7. In wild-type embryos, we  
276 occasionally detected dsRNA together with RAB-7-positive vesicles, but the majority of  
277 the 5EU punctae were not associated with GFP-RAB-7 (Fig. 6A, upper row). In *sid-1*

278 mutant embryos, 5EU punctae are also readily detected outside of RAB-7 vesicles, and  
279 there does not appear to be significantly more 5EU retained within RAB-7 vesicles (Fig.  
280 6A, lower row). Thus, although silencing by inherited dsRNA involves early steps in the  
281 endocytotic pathway, the dsRNA appears to transit this system rapidly. Although *sid-1* is  
282 required for inherited silencing, its activity is not apparent in the localization of 5EU-  
283 labeled dsRNA in oocytes or early embryos.

284

## 285 Discussion

286 Intercellular dsRNA transport in *C. elegans* via the dsRNA channel SID-1 supports  
287 systemic gene silencing throughout the animal and its progeny. Here, we have  
288 described and characterized the maternal and embryonic processes that support  
289 intergenerational dsRNA transport, as summarized in figure 6B.

290 First, we more fully described the result of dsRNA injection into the gonad. In  
291 wild-type animals, dsRNA injection into a single gonad arm results in robust silencing in  
292 nearly all progeny, while similar injection in *sid-1* mutant results in transitory silencing  
293 and only in progeny derived from the injected gonad arm (Figure 1; (WINSTON 2002;  
294 WINSTON *et al.* 2002). While we still do not understand how injected dsRNA escapes  
295 the injected gonad arm or its long-term persistence within the injected animals, its  
296 subsequent uptake into both gonad arms can occur by either a *sid-1*-dependent process  
297 or a *sid-1*-independent but *rme-2*-dependent process (Figure 2). Consistent with the  
298 role of RME-2 as an endocytosis receptor, *sid-1* activity is required subsequently,  
299 presumably to release dsRNA from a membrane enclosed compartment (Figure 3). A  
300 recent report concluded that silencing in progeny in response to ingested dsRNA is  
301 dependent on *rme-2* (MARRÉ *et al.* 2016). Because this conflicts with our results, we  
302 repeated their analysis, discovering that progeny silencing in response to parental  
303 feeding RNAi is developmentally restricted, being most effective in adults. We found  
304 that the progeny of *rme-2* adults are efficiently silenced by feeding RNAi, and suggest  
305 that the slowed development of *rme-2* animals may have compromised their analysis  
306 (Figure 3).

307 The redundancy between *sid-1* and *rme-2* for uptake and transport of dsRNAs  
308 into the germline is contrasted by the necessity for both *sid-1* and *sid-2* for uptake and  
309 transport of dsRNAs into the intestine (WINSTON *et al.* 2007). Presumably, oocyte  
310 expressed SID-1 localizes to the plasma membrane adjacent to the PC space, whereas  
311 intestinal expressed SID-1 does not localize the luminal plasma membrane. This  
312 difference may reflect the privileged environment of the PC space, relative to the  
313 ingested intestinal milieu. An alternative but unlikely scenario is that a second oocyte  
314 expressed endocytosis receptor accounts for the *rme-2*-independent uptake. However  
315 such activity should be apparent in silencing the progeny of *rme-2*; *sid-1* double mutants,  
316 which is not detected. The redundancy between *sid-1* and *rme-2* is significant in light of  
317 reports of *sid-1*-independent RNAi-dependent transgenerational inheritance (SCHOTT *et al.*  
318 *et al.* 2014). It will be interesting to determine whether alternative RNA uptake  
319 mechanisms mediate transgenerational inheritance and inheritance of acquired traits.

320 Our genetic and cytological analysis of dsRNA in oocytes and embryos revealed  
321 a role for *sid-5* alongside *sid-1* in dsRNA import and showed that despite sharing an  
322 endocytosis receptor, yolk protein and dsRNA travel independent intracellular routes.  
323 SID-5 is a late endosomal/multivesicular body localized protein required for efficient



324 systemic RNAi (HINAS *et al.* 2012). Tissue-specific rescue experiments showed that *sid-*  
325 *5* expression in the intestine but not the muscle was sufficient for RNAi silencing of a  
326 muscle gene (HINAS *et al.* 2012). The results presented here, showing a role for SID-5 in  
327 dsRNA import, suggest that efficient release of endocytosed ingested dsRNA to the  
328 cytoplasm is important for subsequent export to muscle cells. Our cytological analysis  
329 of dsRNA within oocytes and embryos indicates that yolk and dsRNA rarely co-localize  
330 (Figure 5). This result challenges the assumption that dsRNA enters oocytes with yolk  
331 granules. Furthermore, the observation that EU- but not Cy5-labeled dsRNA injected  
332 into the PC is internalized within oocytes (Figure 4) suggest specificity in dsRNA uptake  
333 rather than proposed non-specific mechanisms (MARRÉ *et al.* 2016). While *sid-1* and  
334 *sid-5* are required for this endocytosed dsRNA to trigger RNAi silencing, *sid-1* activity is  
335 apparently not required for transit to post-RAB-7 compartments (Figure 5).

336 Our results support a model where SID-1 is required to facilitate dsRNA transport  
337 into the cytoplasm directly from extracellular spaces as well as from endocytotic  
338 vesicles. Indeed, other organisms capable of systemic RNAi may be more reliant on  
339 endocytosis of dsRNA, including organisms that lack SID-1 (SALEH *et al.* 2006), and at  
340 least one insect species has been shown to use both SID-1 and endocytosis (CAPPELLE  
341 *et al.* 2016). A better understanding of the mechanisms by which circulating RNA  
342 reaches the next generation will help us identify endogenous inherited RNAs.

343

## 344 **Materials and Methods**

### 345 **Strains**

346 The following strains were used: N2 wild-type, HC977 *sid-1(qt101)*, HC970 *sid-1(qt78)*,  
347 *sid-1(qt78)*; *sid-2(qt40)*, HC306 *sid-2(qt40)*, HC770 *sid-3(tm342)*, HC302 *sid-5(qt24)*,  
348 HC975 *sid-1(qt78)*; *sid-3(tm342)*, HC976 *sid-1(qt78)*; *sid-5(qt24)*, DH1390 *rme-2(b1008)*,  
349 HC1064 *rme-2(b1008)*; *sid-1(qt101)*, HC17 *bls1[vit-2::GFP + rol-6(su1006)]*; *emb-*  
350 *27(g48)*, HC1060 *sid-1(qt101)*; *bls1[vit-2::GFP + rol-6(su1006)]*, RT123 *pwls21[unc-*  
351 *119(+)*; *Ppie-1::GFP::rab-7*], HC1099 *sid-1(qt78)*; *pwls21[unc-119(+)*; *Ppie-1::GFP::rab-*  
352 *7*]

### 353 **RNAi**

354 Injections of *unc-22* dsRNA were done at a concentration of approximately ~2 mg/ml.  
355 For pseudocoelom injections, the needle was inserted beyond the bend of the gonad  
356 arm but before the pharynx or else in the tail beyond the gonad. Injections were done at  
357 ~13-20 psi, with successful injections appearing to briefly “highlight” tissues along the  
358 entire length of the animal under DIC. For RNAi experiments involving a cross, injected  
359 animals were recovered together on a single OP50 plate for ~12 h before the addition of  
360 triple the number of appropriate males. After ~36 h of mass mating, individual injected  
361 hermaphrodites were singled to new plates along with 3 males and allowed to lay eggs  
362 for ~48 h before all P<sub>0</sub> animals were removed. For the feeding RNAi timing experiment,  
363 a mixed population of N2 animals was bleached in a basic sodium hypochlorite solution  
364 until adult bodies had dissolved, and the released embryos were rinsed in M9. Embryos  
365 were allowed to hatch in shaking M9 for 10 h, and the hatched L1s were then roughly  
366 partitioned and transferred to *unc-22* RNAi food (TIMMONS *et al.* 2001) or OP50 plates  
367 as appropriate by pipetting. Each subsequent day, animals were washed off of the  
368 plates and washed four times in M9 and then transferred to new appropriate bacteria  
369 plates. Gravid adults were washed again, and 30 animals from each group were picked

370 to individual OP50 plates for F<sub>1</sub> collection. Adult and L4 feeding assays were similarly  
371 washed before F<sub>1</sub> collection, but parents were simply picked from mixed populations.  
372 Day 1 adults were prepared by isolating L4 larvae and maintaining for 12 h at 20°C.  
373 Scoring for the strong twitching phenotype characteristic of *unc-22* silencing was done  
374 in 10 mM levamisole in M9 buffer once the F<sub>1</sub> progeny were young adults.

#### 375 **Labeled dsRNA preparation**

376 5EU and Cy5 labeled RNAs were synthesized using the Ampliscribe T7 Flash  
377 Transcription Kit (Epicentre) using a modified version of the manufacturer's protocol to  
378 include the substituted nucleotides. Detailed procedures can be found in the  
379 supplemental methods.

#### 380 **Immunohistochemistry**

381 Slides for microscopy were prepared as in (HINAS *et al.* 2012), with some modifications  
382 for click labeling of 5EU. For mounted adults, 5EU was conjugated to an Alexa 594-  
383 azide using the Click-iT RNA Imaging Kit (Invitrogen). For embryos, 5EU was first  
384 conjugated to biotin-azide (Lumiprobe) using the same Click-iT kit, followed by the  
385 Alexa Fluor 594 Tyramide SuperBoost Kit with streptavidin (Invitrogen) for enhanced  
386 signal. Detailed procedures can be found in the supplemental methods.

#### 387 **Microscopy**

388 Most images were captured using a Zeiss LSM880 microscope using the ZEN software  
389 (Zeiss) at the Harvard Center for Biological Imaging. Embryo images from Cy5/5EU  
390 dual labeling experiments were captured using a Zeiss Axiovert 200 spinning disk  
391 confocal microscope with Axiovision (Zeiss).

392

393

394  
395  
396  
397  
398  
399  
400  
401  
402  
403  
404  
405  
406  
407  
408  
409  
410  
411  
412  
413  
414  
415  
416  
417  
418  
419  
420  
421  
422  
423  
424  
425  
426  
427  
428  
429  
430  
431  
432  
433  
434  
435  
436  
437

## References

- Alcazar, R. M., R. Lin and A. Z. Fire, 2008 Transmission dynamics of heritable silencing induced by double-stranded RNA in *Caenorhabditis elegans*. *Genetics* 180: 1275-1288.
- Buckley, B. A., K. B. Burkhart, S. G. Gu, G. Spracklin, A. Kershner *et al.*, 2012 A nuclear Argonaute promotes multigenerational epigenetic inheritance and germline immortality. *Nature* 489: 447-451.
- Cappelle, K., C. F. R. de Oliveira, V. B. Eynde, O. Christiaens and G. Smagghe, 2016 The involvement of clathrin-mediated endocytosis and two Sid-1-like transmembrane proteins in double-stranded RNA uptake in the Colorado potato beetle midgut. *Insect Molecular Biology* 25: 315-323.
- Feinberg, E. H., and C. P. Hunter, 2003 Transport of dsRNA into cells by the transmembrane protein SID-1. *Science* 301: 1545-1547.
- Feng, Y., B. Press and A. Wandinger-Ness, 1995 Rab 7: an important regulator of late endocytic membrane traffic. *The Journal of Cell Biology* 131: 1435-1452.
- Fire, A., S. Xu, M. K. Montgomery, S. A. Kostas, S. E. Driver *et al.*, 1998 Potent and specific genetic interference by double-stranded RNA in *Caenorhabditis elegans*. *Nature* 391: 806-811.
- Grant, B., and D. Hirsh, 1999 Receptor-mediated endocytosis in the *Caenorhabditis elegans* oocyte. *Molecular biology of the cell* 10: 4311-4326.
- Grishok, A., H. Tabara and C. C. Mello, 2000 Genetic requirements for inheritance of RNAi in *C. elegans*. *Science* 287: 2494-2497.
- Guang, S., A. F. Bochner, K. B. Burkhart, N. Burton, D. M. Pavelec *et al.*, 2010 Small regulatory RNAs inhibit RNA polymerase II during the elongation phase of transcription. *Nature* 465: 1097-1102.
- Guang, S., A. F. Bochner, D. M. Pavelec, K. B. Burkhart, S. Harding *et al.*, 2008 An Argonaute transports siRNAs from the cytoplasm to the nucleus. *Science* 321: 537-541.
- Hamilton, A. J., and D. C. Baulcombe, 1999 A species of small antisense RNA in posttranscriptional gene silencing in plants. *Science* 286: 950-952.
- Hinas, A., A. J. Wright and C. P. Hunter, 2012 SID-5 is an endosome-associated protein required for efficient systemic RNAi in *C. elegans*. *Current biology* 22: 1938-1943.
- Hutvagner, G., and P. D. Zamore, 2002 RNAi: nature abhors a double-strand. *Current opinion in genetics & development* 12: 225-232.
- Ivashuta, S., Y. Zhang, B. E. Wiggins, P. Ramaseshadri, G. C. Segers *et al.*, 2015 Environmental RNAi in herbivorous insects. *RNA* 21: 840-850.
- Jao, C. Y., and A. Salic, 2008 Exploring RNA transcription and turnover in vivo by using click chemistry. *Proc Natl Acad Sci USA* 105: 15779-15784.
- Jose, A. M., Y. A. Kim, S. Leal-Ekman and C. P. Hunter, 2012 Conserved tyrosine kinase promotes the import of silencing RNA into *Caenorhabditis elegans* cells. *Proc Natl Acad Sci USA* 109: 14520-14525.
- Jose, A. M., J. J. Smith and C. P. Hunter, 2009 Export of RNA silencing from *C. elegans* tissues does not require the RNA channel SID-1. *Proceedings of the National Academy of Sciences of the United States of America* 106: 2283-2288.

- 438 Marré, J., E. C. Traver and A. M. Jose, 2016 Extracellular RNA is transported from one  
439 generation to the next in *Caenorhabditis elegans*. *Proc Natl Acad Sci USA* 113:  
440 12496-12501.
- 441 McEwan, D. L., A. S. Weisman and C. P. Hunter, 2012 Uptake of extracellular double-  
442 stranded RNA by SID-2. *Molecular Cell* 47: 746-754.
- 443 Saleh, M.-C. C., R. P. van Rij, A. Hekele, A. Gillis, E. Foley *et al.*, 2006 The endocytic  
444 pathway mediates cell entry of dsRNA to induce RNAi silencing. *Nature Cell*  
445 *Biology* 8: 793-802.
- 446 Schott, D., I. Yanai and C. P. Hunter, 2014 Natural RNA interference directs a heritable  
447 response to the environment. *Scientific Reports* 4: 7387.
- 448 Sharp, P. A., 2001 RNA interference—2001. *Genes & development* 15: 485-490.
- 449 Sharrock, W. J., M. E. Sutherlin, K. Leske, T. K. Cheng and T. Y. Kim, 1990 Two distinct  
450 yolk lipoprotein complexes from *Caenorhabditis elegans*. *The Journal of*  
451 *biological chemistry* 265: 14422-14431.
- 452 Shih, J. D., and C. P. Hunter, 2011 SID-1 is a dsRNA-selective dsRNA-gated channel.  
453 *RNA* 17: 1057-1065.
- 454 Timmons, L., D. L. Court and A. Fire, 2001 Ingestion of bacterially expressed dsRNAs  
455 can produce specific and potent genetic interference in *Caenorhabditis elegans*.  
456 *Gene* 263: 103-112.
- 457 Winston, W. M., 2002 Systemic RNAi Defective Mutants in the Nematode *C. elegans*.  
458 Harvard University.
- 459 Winston, W. M., C. Molodowitch and C. P. Hunter, 2002 Systemic RNAi in *C. elegans*  
460 requires the putative transmembrane protein SID-1. *Science* 295: 2456-2459.
- 461 Winston, W. M., M. Sutherlin, A. J. Wright, E. H. Feinberg and C. P. Hunter, 2007  
462 *Caenorhabditis elegans* SID-2 is required for environmental RNA interference.  
463 *Proc Natl Acad Sci USA* 104: 10565-10570.
- 464 Zamore, P. D., T. Tuschl, P. A. Sharp and D. P. Bartel, 2000 RNAi: double-stranded  
465 RNA directs the ATP-dependent cleavage of mRNA at 21 to 23 nucleotide  
466 intervals. *Cell* 101: 25-33.
- 467

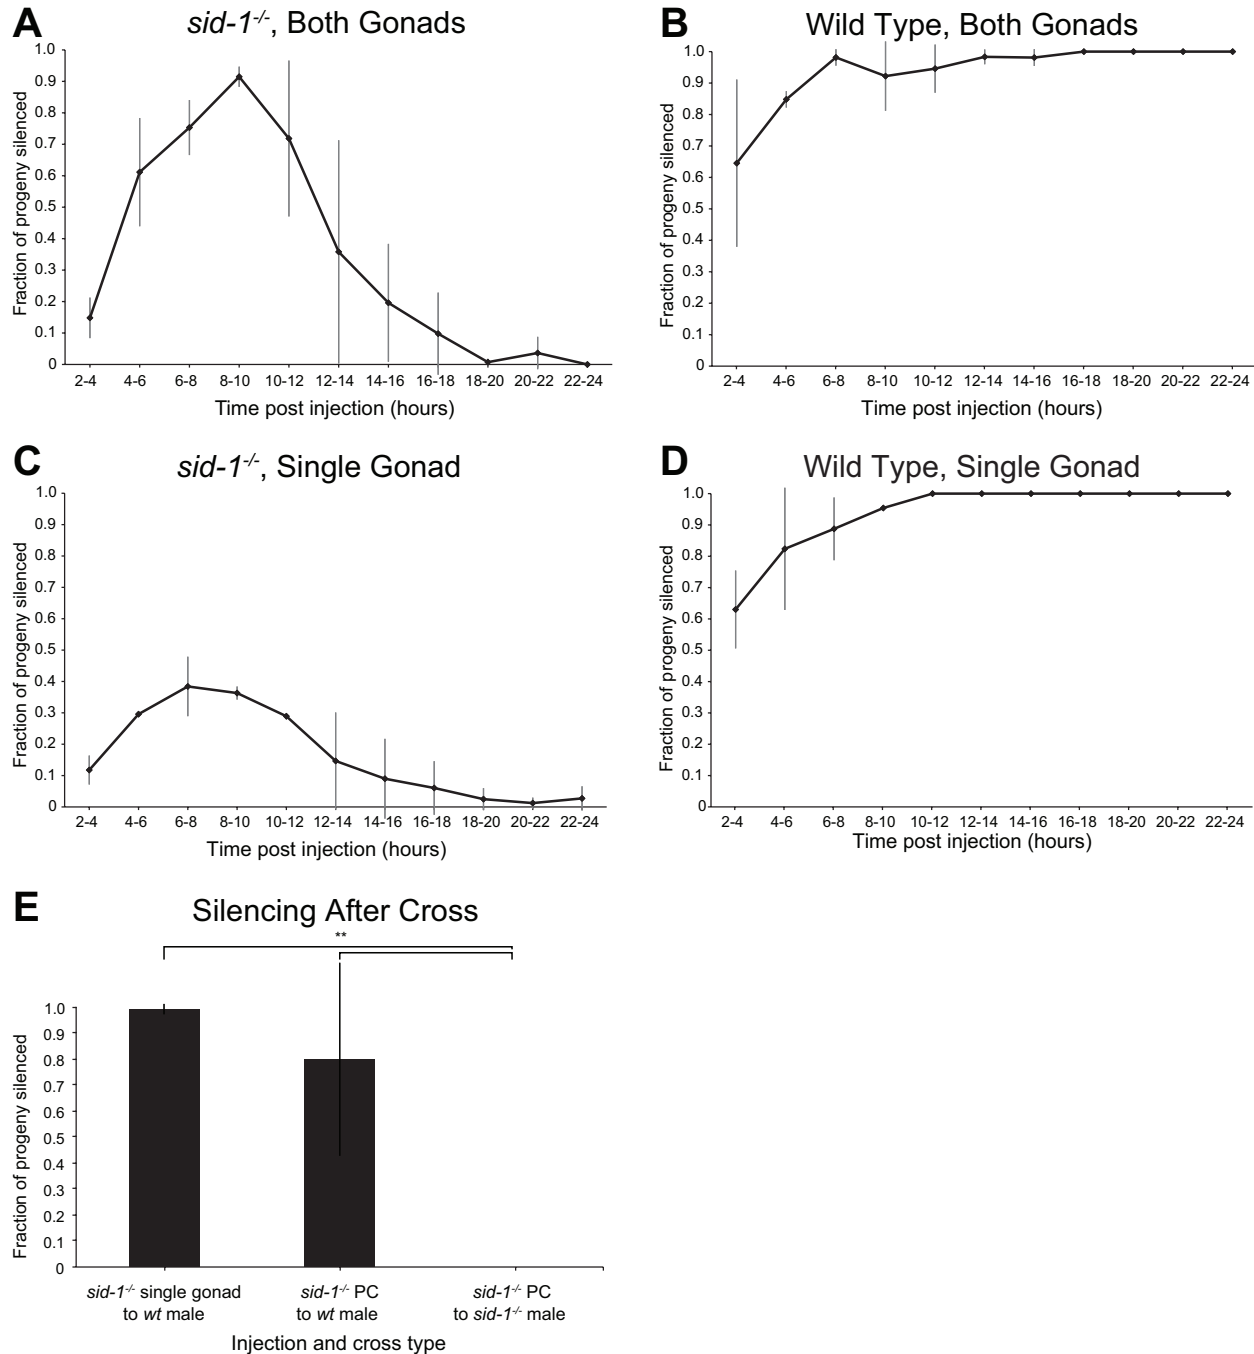

468  
 469 **Fig. 1.** *sid-1*-dependent and -independent silencing in progeny of dsRNA injected  
 470 parents. (A-D) Time course of fraction of progeny with the Unc-22 phenotype laid after  
 471 *unc-22* dsRNA gonad injection into wild-type or *sid-1* mutant hermaphrodites. (E)  
 472 Fraction of progeny with Unc-22 phenotype following *unc-22* dsRNA gonad or PC  
 473 injection into *sid-1<sup>-/-</sup>* mutant hermaphrodites crossed to wild-type or *sid-1* mutant males.  
 474 Error bars in (A-D) represent standard error from two experiments with 10 injected  
 475 hermaphrodites each. Error bars in (E) represent standard deviation from 4, 6, and 3  
 476 injected hermaphrodites, left to right. \*\* $p < 0.01$  by Welch's  $t$  test.  
 477

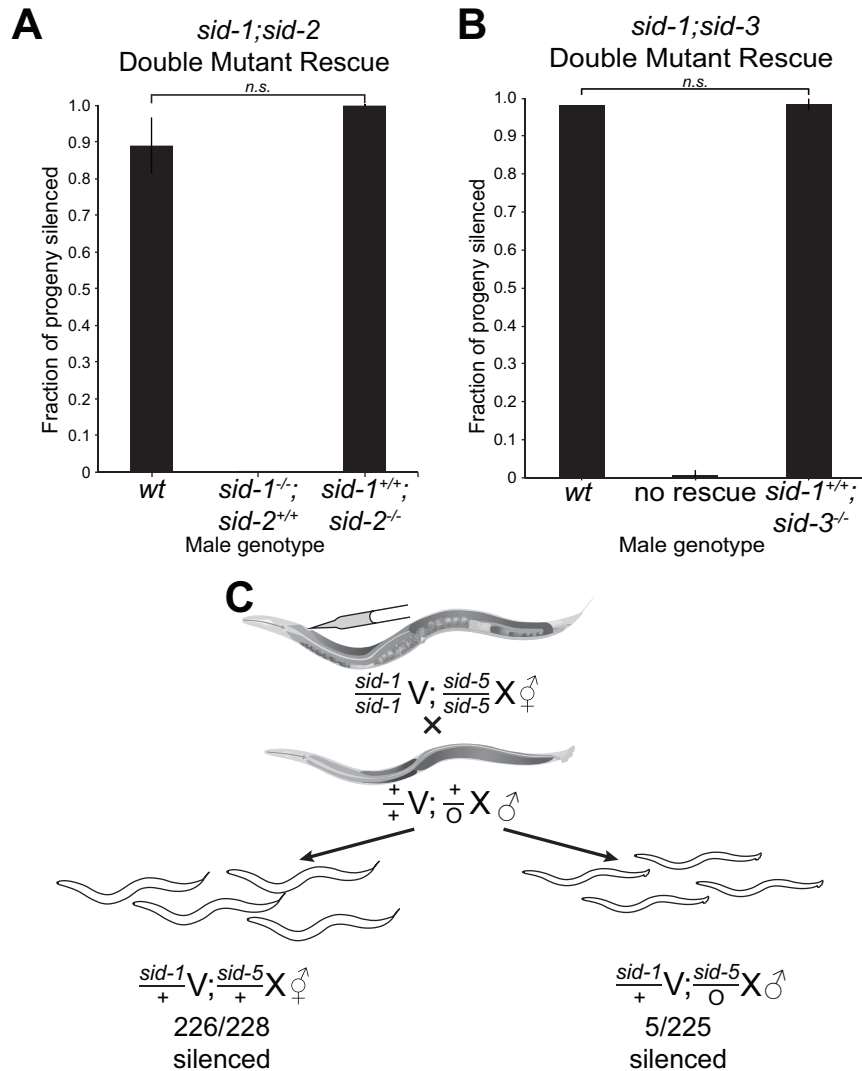

478  
479 **Fig. 2.** Maternal and zygotic Sid-dependence of inherited silencing. (A) Fraction of *unc-*  
480 *22* silenced cross progeny from *sid-1; sid-2* double-mutant hermaphrodites first PC-  
481 injected with *unc-22* dsRNA and then crossed to either wild-type, *sid-1; sid-2* double  
482 mutant, or *sid-2* single mutant males. (B) Fraction of *unc-22* silenced cross progeny  
483 from *sid-1; sid-3* double-mutant hermaphrodites first PC-injected with *unc-22* dsRNA  
484 and then crossed to wild-type, *sid-1; sid-3* double mutant, or *sid-3* single mutant males.  
485 (C) Schematic of the injection, cross, and *unc-22* silencing scoring of cross progeny  
486 from *sid-1; sid-5* double mutant hermaphrodites first PC-injected with *unc-22* dsRNA  
487 and then crossed to wild-type males. *sid-5* is X-linked, thus hermaphrodite progeny are  
488 heterozygous and males are hemizygous. Error bars in (A, B) represent standard  
489 deviation from 4, 7, and 5 injected hermaphrodites in (A) and 1, 3, and 3 injected  
490 hermaphrodites in (B). 3 injected hermaphrodites in (C). *n.s.* = not significant.  
491

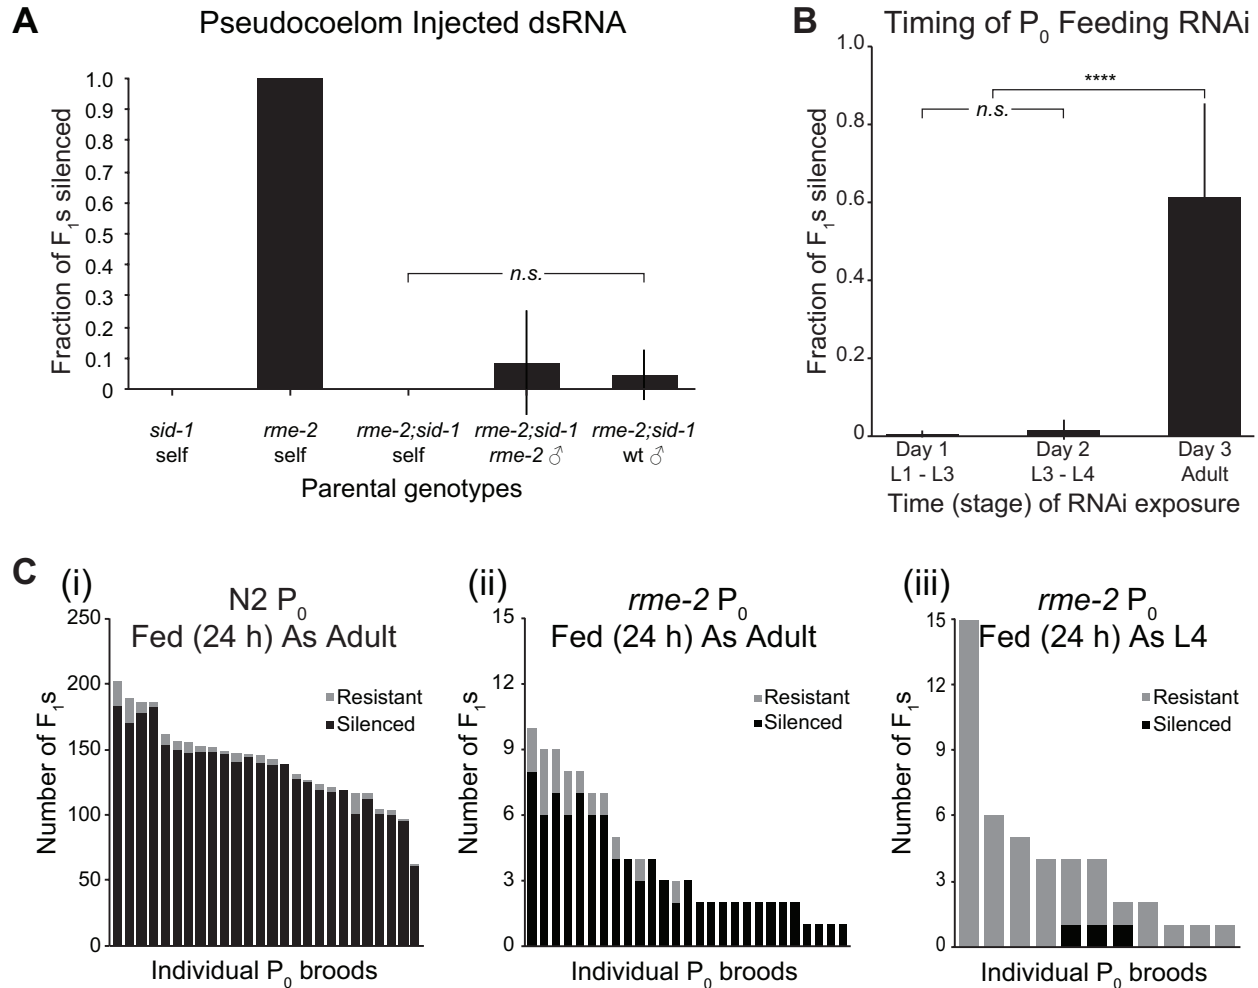

492  
493  
494  
495  
496  
497  
498  
499  
500  
501  
502  
503  
504  
505

**Fig. 3. Maternal RME-2-dependent inherited silencing.** (A) Fraction of progeny sensitive to *unc-22* silencing among the self-progeny or indicated cross-progeny of hermaphrodites PC-injected with *unc-22* dsRNA.  $n = 6, 5, 3, 4,$  and  $12$  injected hermaphrodites respectively. (B) Fraction of progeny sensitive to *unc-22* silencing after wild-type parents were exposed to feeding RNAi at the given periods of time after hatching.  $n = 30$  treated parents for each group. (C) Sensitivity to *unc-22* feeding RNAi in progeny after treating (i) wild-type parents as adults, (ii) *rme-2* mutant parents as adults, or (iii) *rme-2* mutant parents as L4 larvae. Because *rme-2* mutants have severely reduced fecundity, the results from each individual parent are presented separately for clarity, with silenced progeny represented in black bars and non-silenced progeny in grey bars. All error bars represent standard deviation. \*\*\*\* $p < 0.00001$  by  $t$  test.  $n.s.$  = not significant.

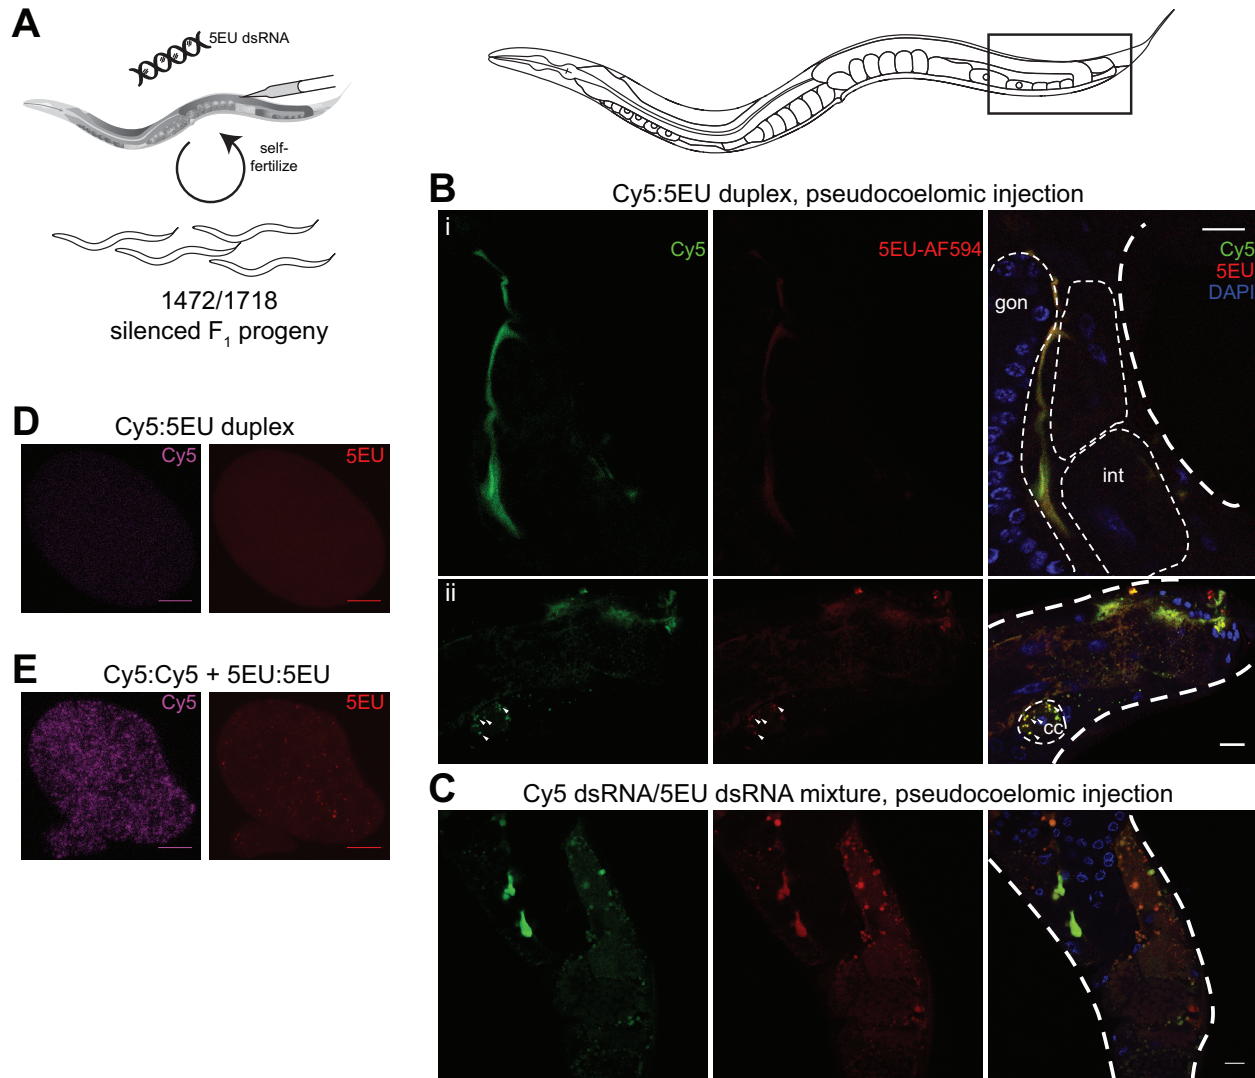

506  
507 **Fig. 4.** Visualizing 5-Ethynyluridine (5EU) labeled functional dsRNA. (A) Injected 5EU  
508 dsRNA injected into only one gonad arm produces >50% affected progeny.  $n = 8$   
509 injected hermaphrodites. (B) Localization of PC injected Cy5:5EU heteroduplex dsRNA.  
510 Cy5 fluorescence and 5EU detection co-localize in the pseudocoelom (*i*) and a  
511 coelomocyte (*cc*) (*ii*; white arrowheads). (C) Independent localization of PC injected 5EU  
512 and Cy5 labeled dsRNA. Images in (B) and (C) represent portions of dissected and  
513 partially flattened adult hermaphrodites. Thick dotted lines mark the boundary of the  
514 animal, and thinner dotted lines mark structures such as the gonad (*gon*) or intestinal  
515 cells (*int*) as landmarks for orientation. (D, E) Cy5 and 5EU signal in embryos collected  
516 from adults injected with the dsRNA species described in (B) and (C) respectively. The  
517 two Cy5 images are overexposed, revealing diffuse autofluorescence and no detectable  
518 RNA. Scale bars = 10  $\mu$ m.  
519



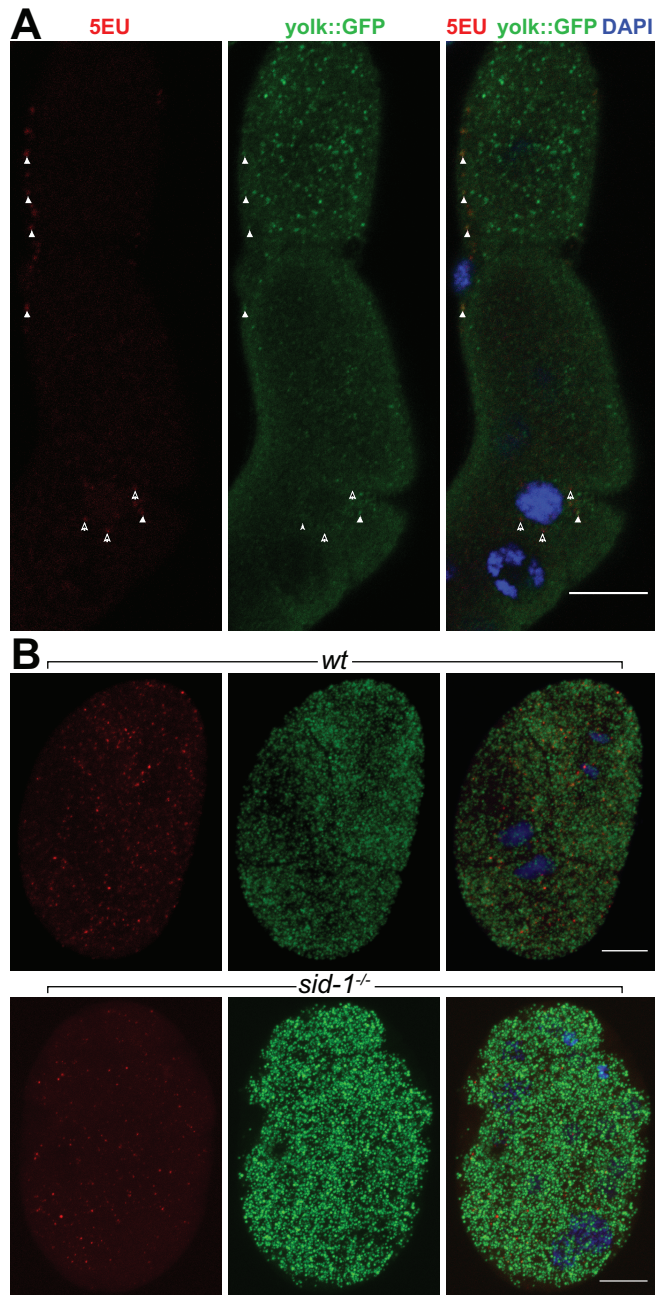

520  
521  
522  
523  
524  
525  
526  
527

**Fig. 5.** Co-localization of 5EU-labeled dsRNA and VIT-2::GFP on and within oocytes. (A) PC-injected 5EU-labeled dsRNA co-localized with GFP-labeled yolk at the surface of developing oocytes (white arrowheads), but not intracellularly (notched arrowheads). More proximal oocyte (top) contains more VIT-2::GFP. (B) Maximum z-projections of VIT-2::GFP and 5EU-labeled dsRNA in wild-type and *sid-1*<sup>-/-</sup> embryos show little co-localization. Scale bars = 10  $\mu$ m.

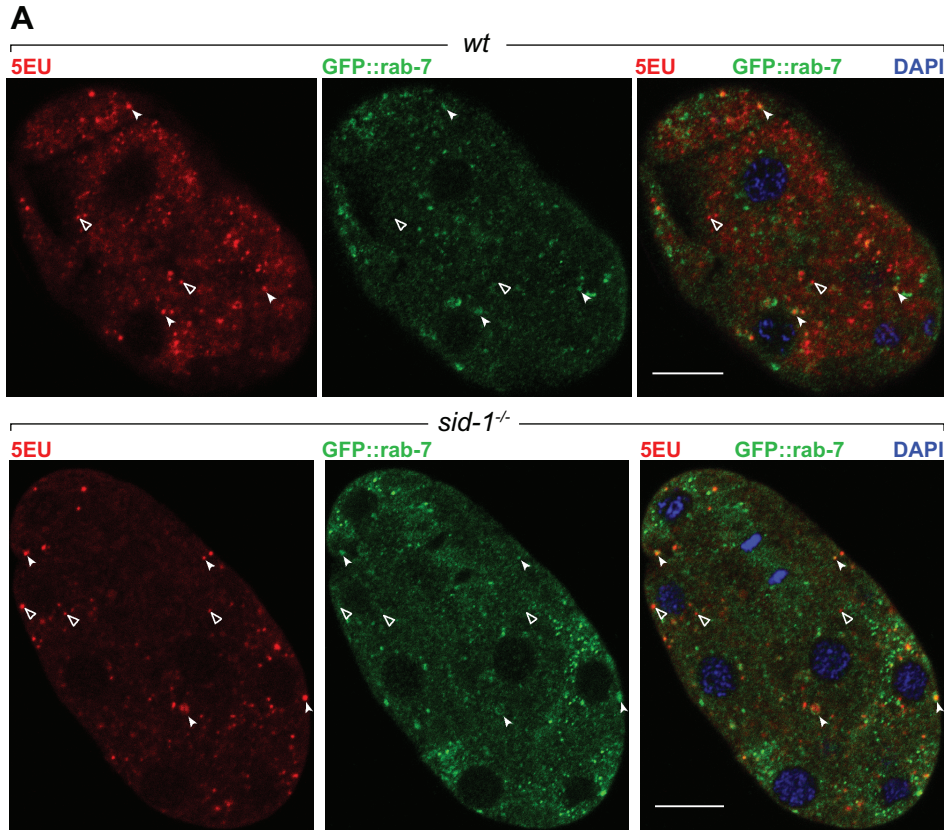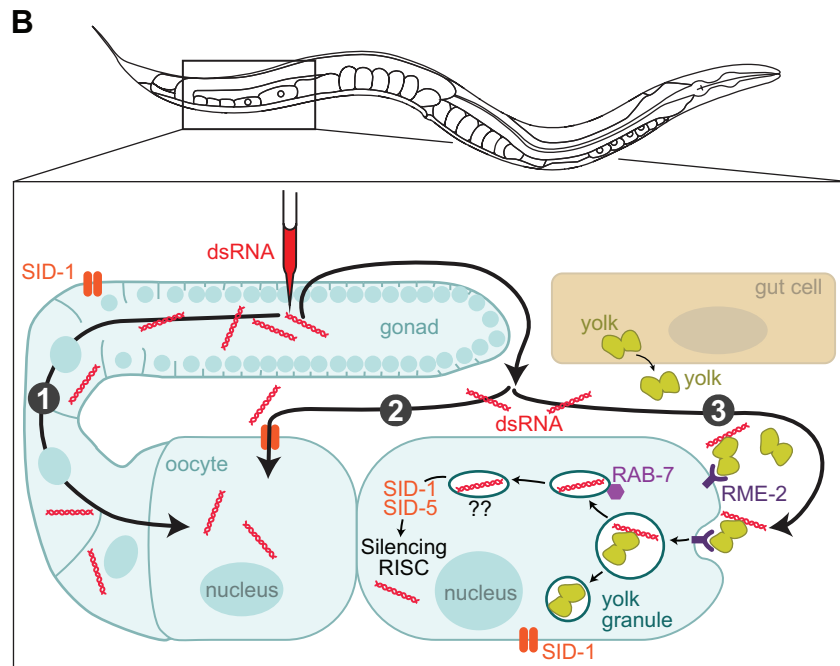

528  
 529 **Fig. 6.** Co-localization of dsRNA and GFP::RAB-7. (A) 5EU foci detected in embryos  
 530 after pseudocoelomic 5EU-labeled dsRNA injection co-localizes with GFP:: RAB-7  
 531 (notched arrowheads) but is also found outside of RAB-7 structures (open arrowheads)  
 532 in both wild-type (upper row) and *sid-1* mutant (*Lower row*) embryos. Scale bars = 10  
 533  $\mu$ m. (B) Model for three inherited dsRNA transport pathways. 1) DsRNA injected directly

534 into the syncytial germline can silence the resulting progeny without SID-1. Some  
535 injected dsRNA exits the gonad to the PC and is then 2) endocytosed into developing  
536 oocytes via LDL receptor super-family member RME-2, or 3) this PC dsRNA can also  
537 be directly transported into oocytes via SID-1.

## Supplemental methods

### Labeled RNA preparation

Purified RNA was synthesized by *in vitro* transcription (IVT) from a DNA template containing T7 promoter sequences. For labeled and unlabeled *unc-22* dsRNA, template DNA was prepared by PCR using primers with the T7 promoter sequence appended to the 5' end of both forward and reverse primers. For the Cy5- and 5EU-containing RNA in Fig. 4, the forward and reverse strands of the eventual dsRNA were prepared independently from template DNA containing only a single T7 promoter.

IVT was performed using an Ampliscribe T7 Flash kit (Epicentre) according to manufacturer instructions with the following modifications for labeled RNAs. For 5EU-labeled RNA, the 100 mM UTP in the reaction was substituted with an equal volume of a 1:1 mixture of UTP and 100mM 5-ethynyl-UTP (Jena Bioscience). 5EU-labeled RNA can also be synthesized using only 5-ethynyl-UTP and no unmodified UTP and behaves similarly in the experiments we performed. For Cy5-labeled RNA, instead of individually adding 0.9  $\mu$ l of each NTP, a mixture of equal amounts of 100 mM ATP, CTP, and GTP was prepared, and 4.55  $\mu$ l of this mixture was added to the reaction, followed by 1  $\mu$ l of 100 mM UTP and 3  $\mu$ l of 10 mM Cy5-UTP (Amersham). IVT reactions of labeled RNA were incubated at 37°C for 4.5 h, and then treated with DNase I at 37°C for 15 min. Synthesized RNA was purified using an RNeasy kit (Qiagen). Equal quantities of complementary strands of RNA were then annealed together by heating mixtures to 95°C for 2 min and then gradually lowering the temperature to 20°C at a rate of 0.1°C per second.

## Immunohistochemistry

After injection of 5EU-labeled RNA, adults or isolated embryos were transferred to a poly-L-lysine coated slide and covered with 10  $\mu$ l of 4% paraformaldehyde solution (PFA). A square cover glass was then placed on to the sample, and excess liquid removed by wicking to a tissue paper until the point of mechanical rupturing of eggshells or cuticles to provide access to the fixative. Samples were then left to fix for 15 min at room temperature before flash freezing in liquid nitrogen. Afterwards, the cover glass was removed with a razor blade to help remove cuticles and eggshells. Samples were then fixed in  $-20^{\circ}\text{C}$  methanol for 15 min, and then briefly rinsed in PBS. The final preparation step before labeling was sample permeabilization in a 0.1% Tween-20 in phosphate buffered saline (PBS) solution for 15 min at room temperature.

Labeling of samples containing 5EU-RNA was performed with a Click-iT RNA Imaging kit (Invitrogen) according to manufacturer instructions, but reaction volumes reduced to 100  $\mu$ l per slide. For adult worm samples, labeling was done with Alexa Fluor 594 azide (Thermo Fisher), but embryo samples typically substituted 2.66  $\mu$ M biotin azide (Lumiprobe) for additional signal amplification. Click labeling reactions were incubated at room temperature for 30 min and then stopped with addition of stop solution from the kit, and then washed 3 times in PBS. Samples to be labeled only with Alexa fluor could be mounted in Vectashield with DAPI and sealed under a coverslip at this point, or further processed with additional labeling.

Embryo samples requiring signal amplification were further processed with the Alexa Fluor 594 Tyramide SuperBoost Kit with streptavidin (Invitrogen) according to manufacturer instructions, with the tyramide labeling reaction allowed to proceed for 8

minutes. After washing 3 times in PBS for 10 minutes each, slides were mounted and sealed, or additionally labeled by antibody staining.

Samples requiring antibody labeling were incubated at room temperature for 1 h with a rabbit polyclonal GFP antibody (Invitrogen) diluted 1:200 in a solution of 5% bovine serum albumin (BSA) in PBS with 0.1% Tween-20. After washing 3 times in PBS, samples were then incubated at room temperature for 1 h with an Alexa Fluor 488-conjugated goat anti-rabbit secondary antibody (Invitrogen). After washing 3 times in PBS, slides were mounted with Vectashield with DAPI and sealed.

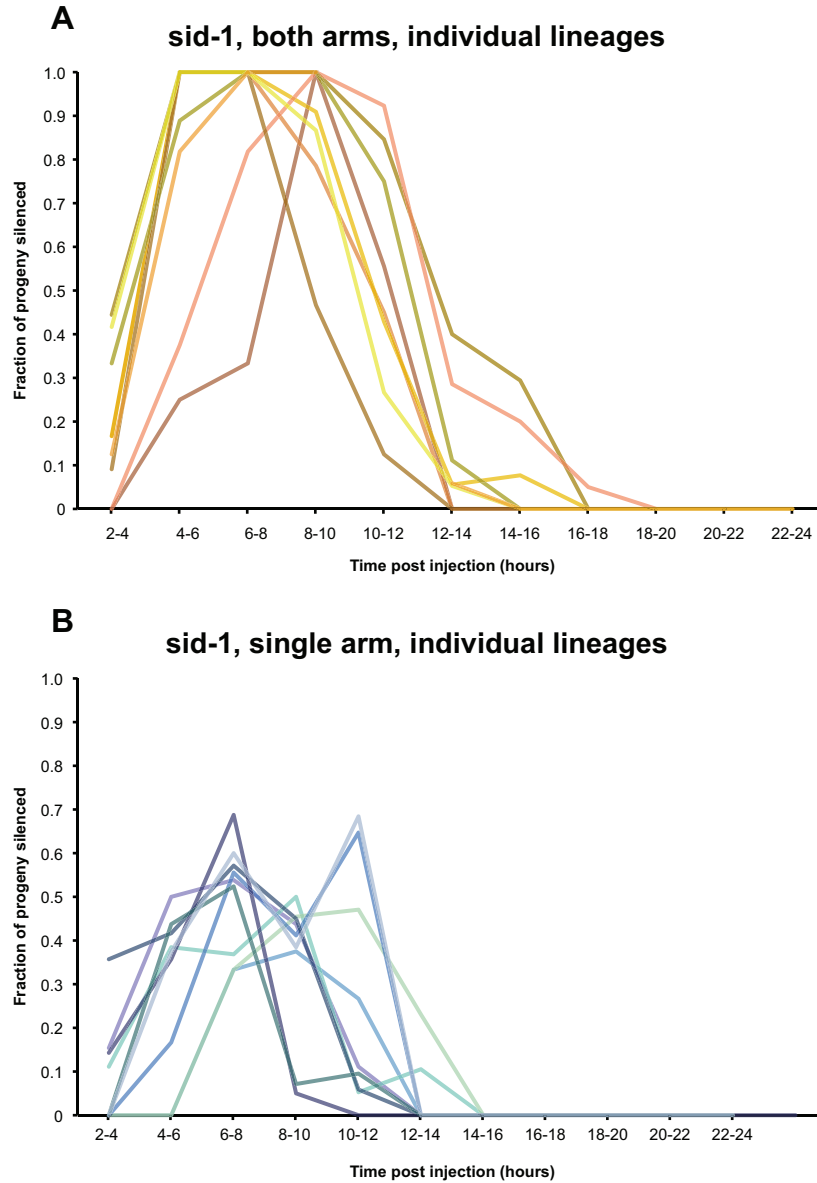

**Figure S1. Individual lineages achieve maximum silencing with variable timing**

Expanded data from Figure 1, panels 1A and 1C. Each panel in Figure 1 represents the average of two experiments, with the data corresponding to the progeny of each 10 injected animals in each duplicate. Here, the data from one of the replicates from panels 1A and 1C respectively are expanded in (A) and (B) to show the data from each individual injected animal as a separate line.
